# Supplementary material for: Numerical value biases sound localization
Source: PubMed Central journal article supplement (PMC5722947; doi:10.1038/s41598-017-17429-4), 2017-12-08
Supplement: 41598_2017_17429_MOESM1_ESM.pdf [file 41598_2017_17429_MOESM1_ESM.pdf]

# Numerical value biases sound localization

Edward J. Golob<sup>1,2,5</sup>, Jörg Lewald<sup>3,4</sup>, Stephan Getzmann<sup>3,4</sup>,

Jeffrey R. Mock<sup>1,5</sup>

<sup>1</sup> Department of Psychology, Tulane University, New Orleans, LA, USA

<sup>2</sup> Program in Neuroscience, Tulane University, New Orleans, LA, USA

<sup>3</sup> Faculty of Psychology, Ruhr University Bochum, D-44780 Bochum, Germany

<sup>4</sup> Leibniz Research Centre for Working Environment and Human Factors, Ardeystrasse 67, D-44139 Dortmund, Germany

<sup>5</sup> Present address: Department of Psychology, University of Texas, San Antonio

Correspondence:

Edward J. Golob, PhD

Department of Psychology

1 UTSA Circle

University of Texas, San Antonio,

San Antonio, TX 78249

email: edward.golob@utsa.edu

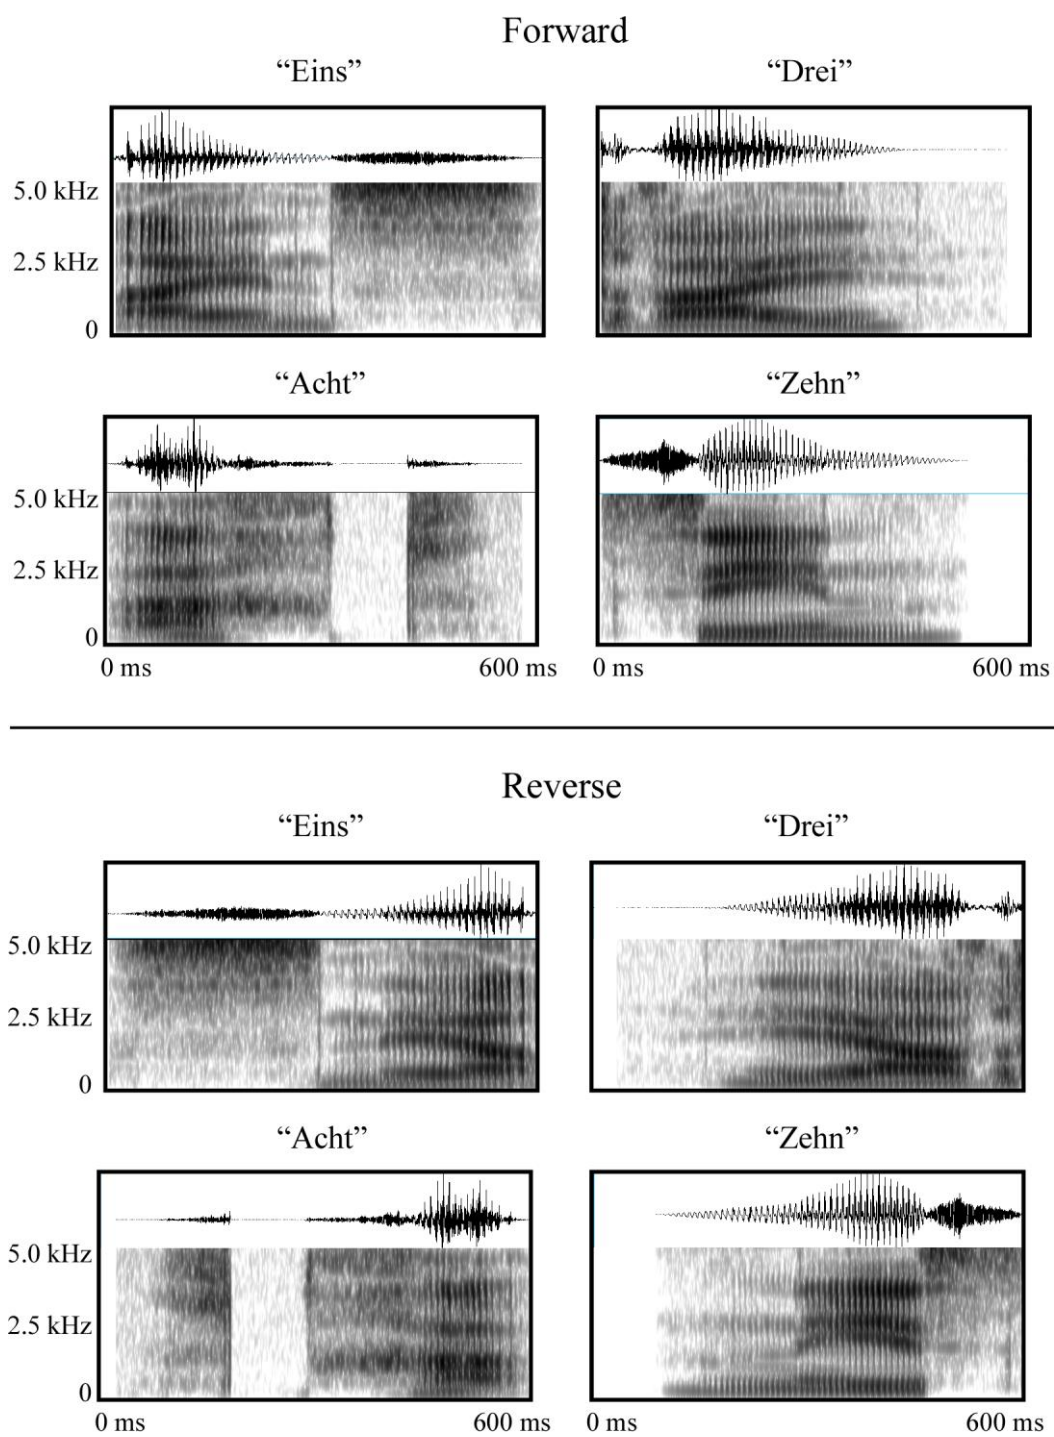

**Supplemental Figure 1.** Plots of speech waveforms and spectrograms for number stimuli used in Experiment 1. Forward presentation is in the top panel, and reverse presentation is shown in the lower panel.

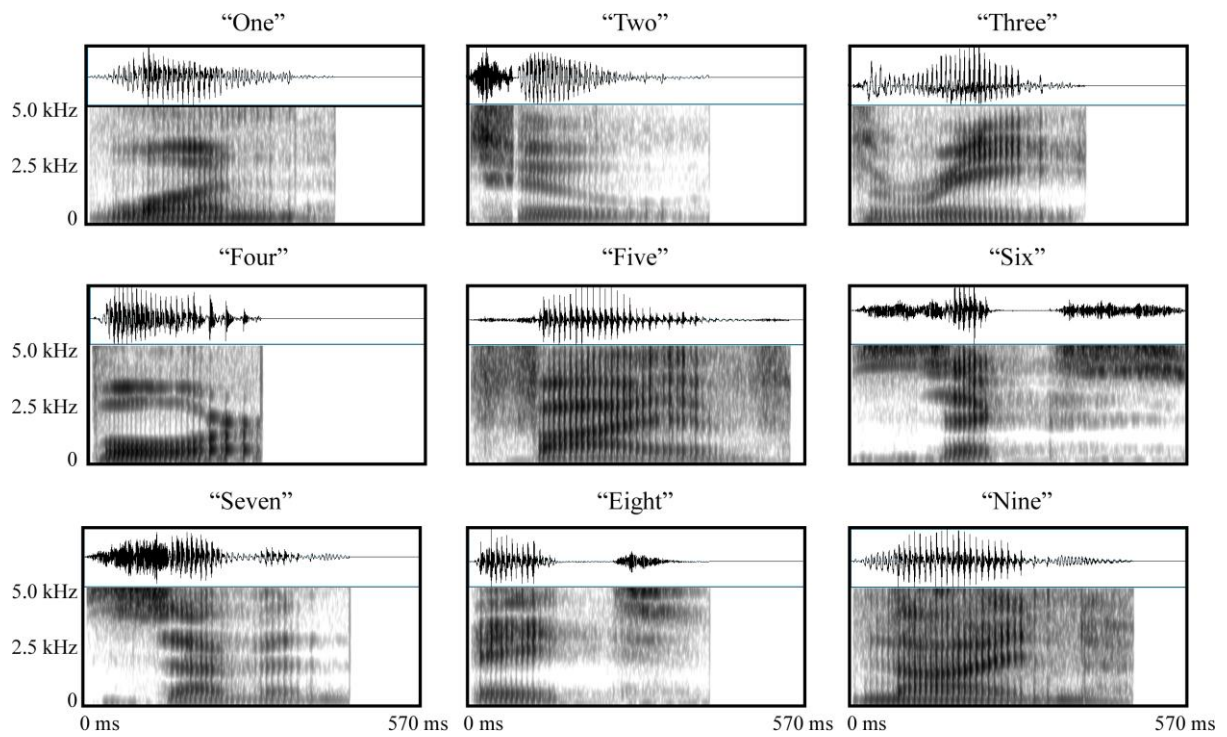

**Supplemental Figure 2.** Plots of speech waveforms and spectrograms for number stimuli used in Experiments 2, 3, and 4. Stimuli were from the 0° (midline) virtual location.
